# Supplementary material
Source: PubMed Central journal article supplement (PMC8831463)
Supplement: NIHMS1745034-supplement-2.pdf [file NIHMS1745034-supplement-2.pdf]

# Supplementary Figure S1

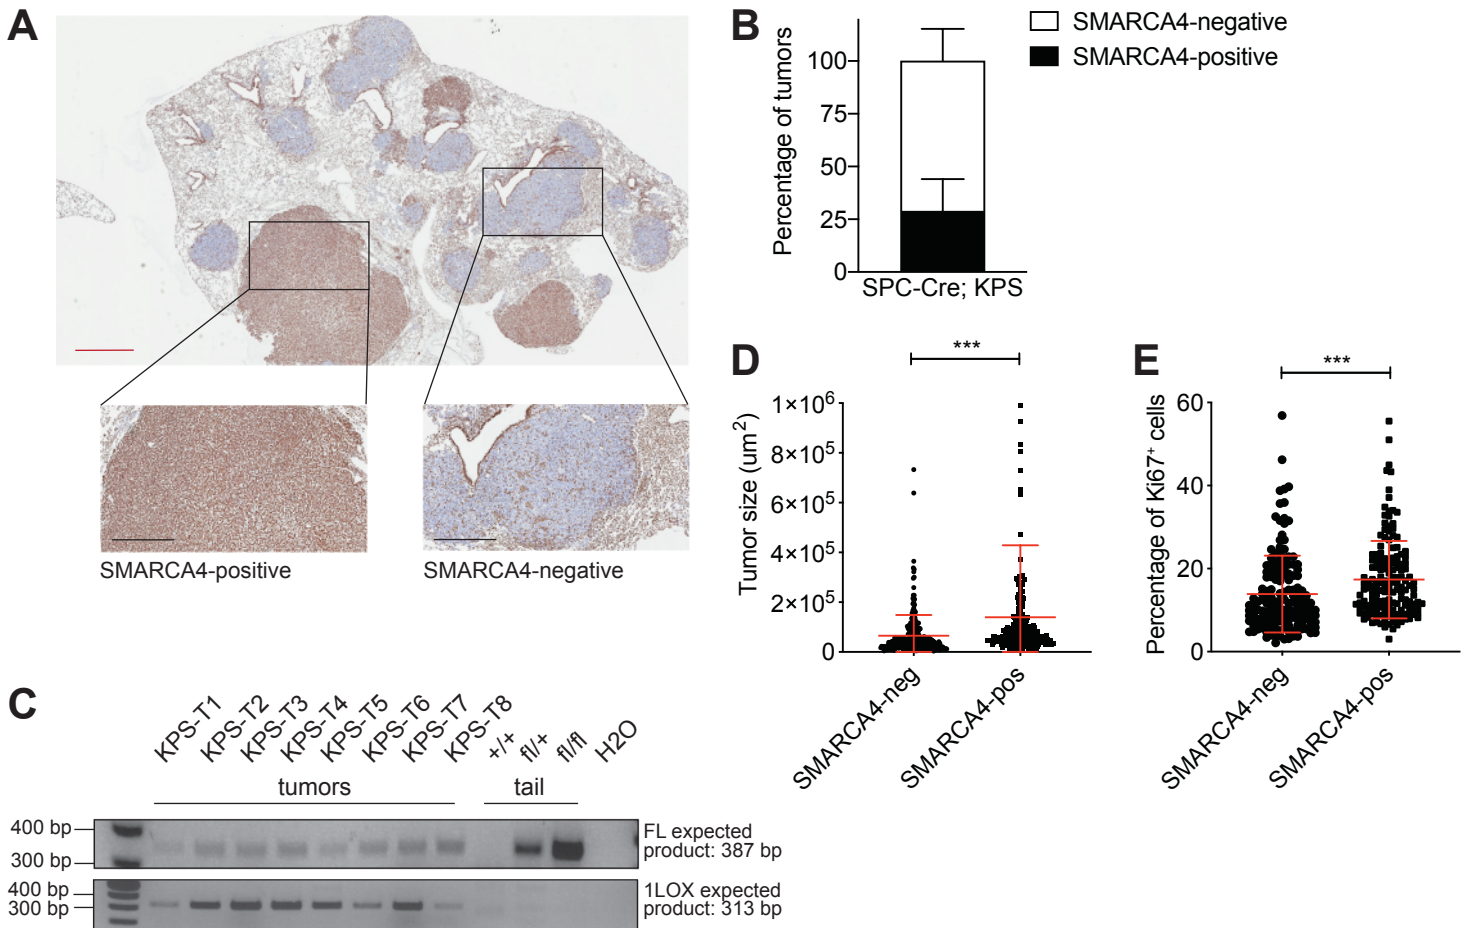

## Supplementary Figure S1. A fraction of tumors initiated from SPC<sup>+</sup> cells in KPS animals retain SMARCA4 expression.

(A) Representative SMARCA4 staining of a tumor-bearing lung from a KPS animal infected with Ad-SPC-Cre showing retained SMARCA4 expression in multiple tumors. Red scale bar: 1 mm; black scale bars: 500  $\mu\text{m}$ . (B) Quantification of the percentage of SMARCA4-positive and -negative tumors in the lungs of KPS animals ( $n=8$ ) infected with Ad-SPC-Cre. Data are mean  $\pm$  s.d. (C) Genotyping PCR of laser-capture microdissected SMARCA4-positive tumors from KPS animals detecting the *Smarca4* floxed (387 bp) and recombined (313 bp) alleles. (D) Quantification of SMARCA4-negative and -positive tumor size in KPS animals. Red lines are mean  $\pm$  s.d. Student's two-tailed unpaired t-test: \*\*\* $p = 0.0001$ . (E) Quantification of the percentage of Ki67-positive cells in SMARCA4-negative and -positive tumors in KPS animals. Red lines are mean  $\pm$  s.d. Student's two-tailed unpaired t-test: \*\*\* $p = 0.0009$ .

# Supplementary Figure S2

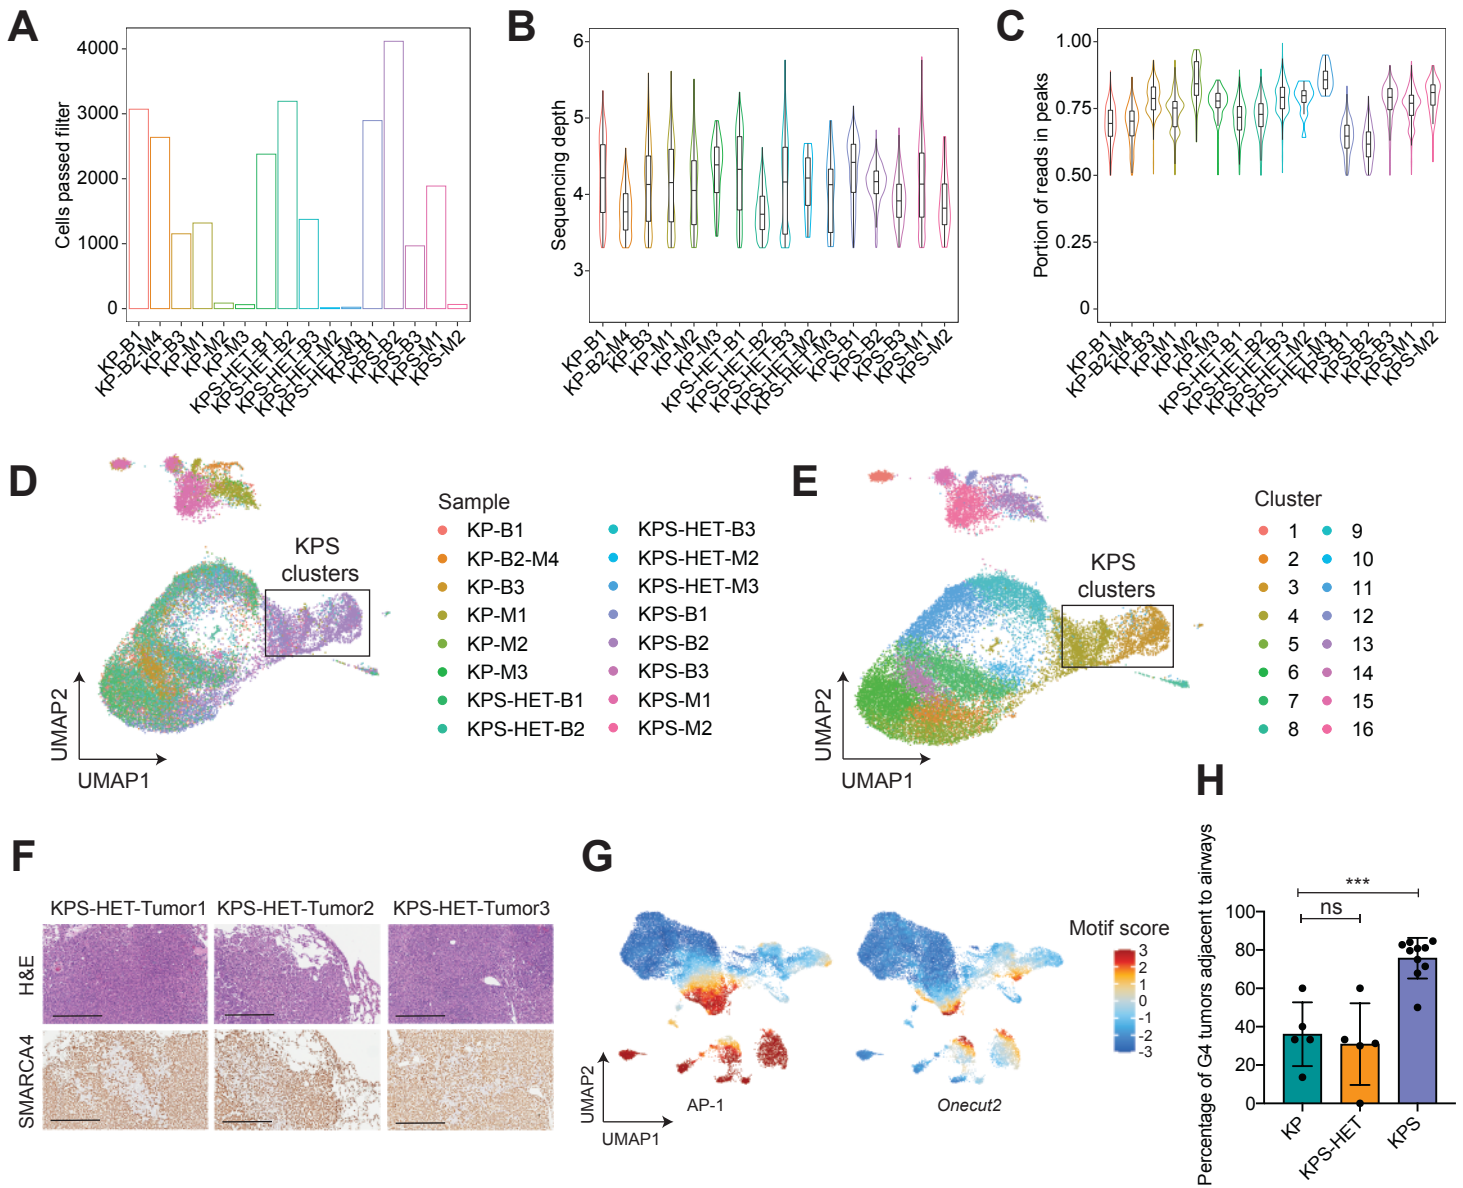

## Supplementary Figure S2. The chromatin accessibility profiles and features of *Smarca4*-deficient murine lung adenocarcinomas initiated from SPC-expressing cells.

Quality control metrics for scATAC-seq dataset showing: **(A)** number of cells per sample passing quality control filters; **(B)** sequencing depth per sample; **(C)** fraction of reads in peaks. UMAP projection of chromatin accessibility profiles reduced using chromVAR colored by **(D)** sample and **(E)** cluster. Clusters specific to KPS samples are boxed. **(F)** H&E and SMARCA4 staining of KPS-HET tumors with SMARCA4-negative cancer cells. Scale bar: 300  $\mu$ m. **(G)** UMAP projection of scATAC-seq dataset colored by AP-1 and *Onecut2* motif scores. **(H)** Percentage of Grade 4 tumors located adjacent to airways in KP (n=5), KPS-HET (n=5), and KPS (n=10) animals. Data are mean  $\pm$  s.d. One-way ANOVA:  $F(2, 17) = 19.45$ ,  $p < 0.0001$ ; Dunnett's multiple comparisons test: \*\*\*adjusted  $p$ -value = 0.0004.

# Supplementary Figure S3

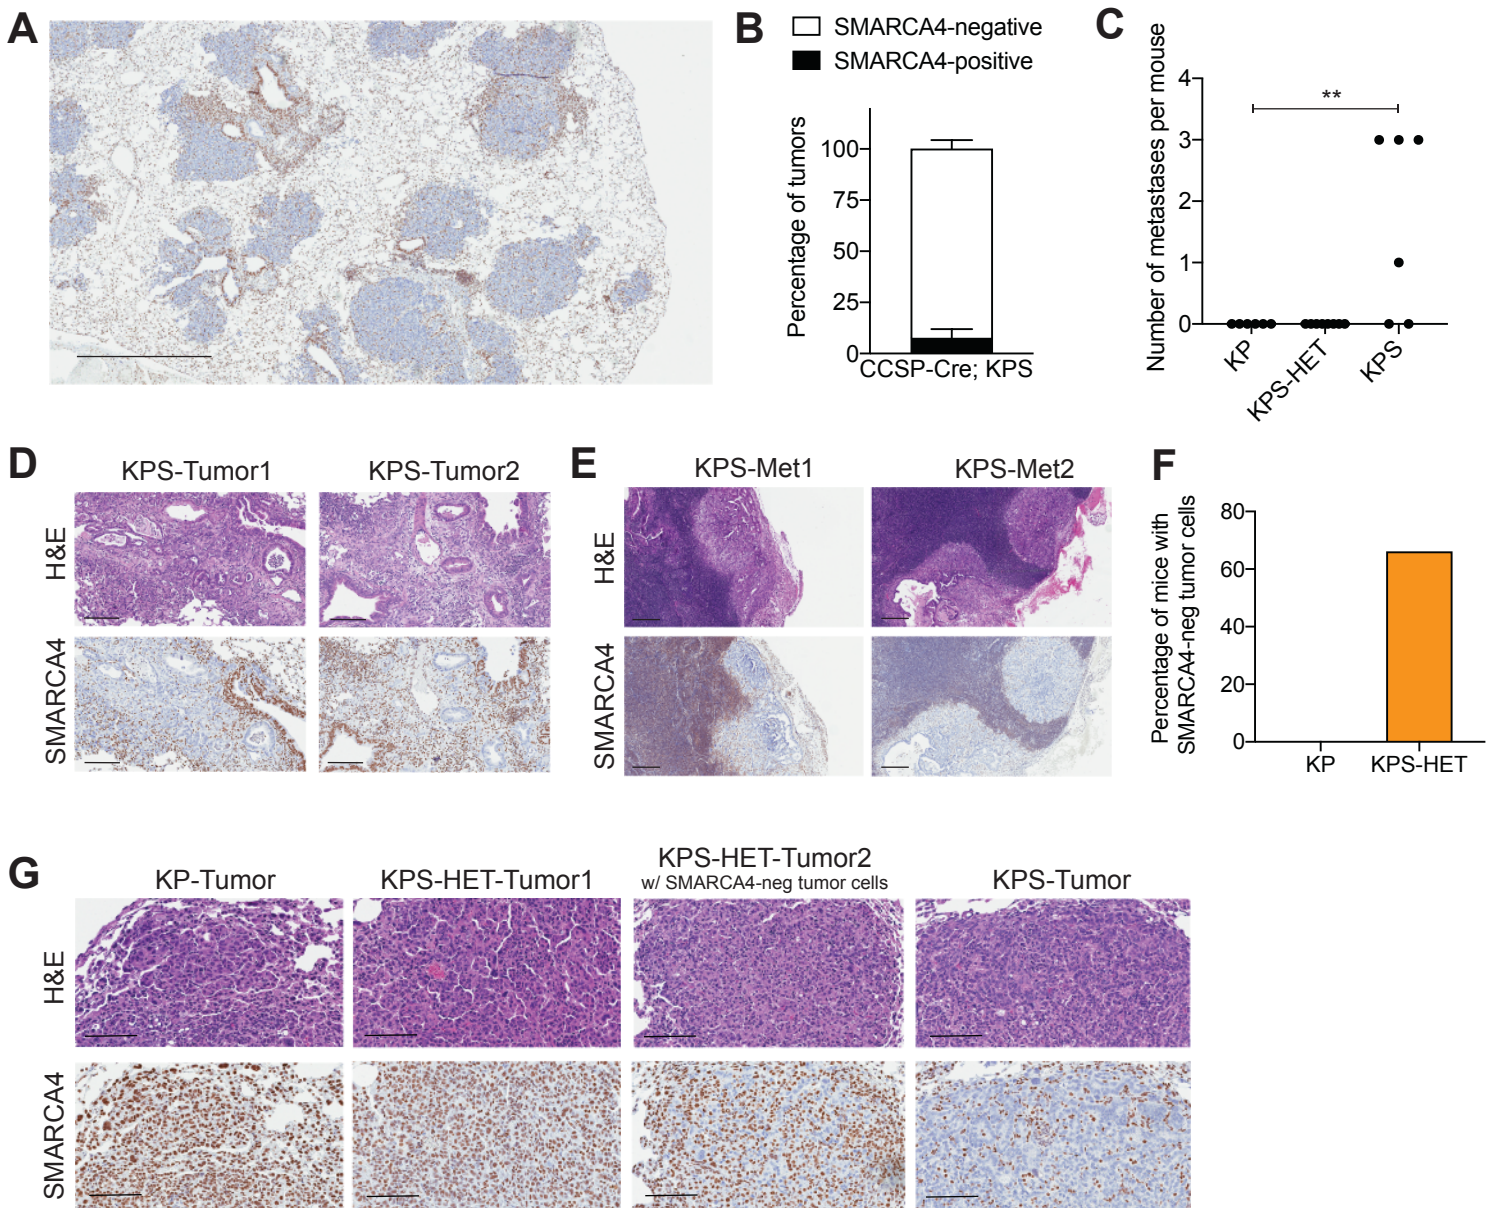

## Supplementary Figure S3. Loss of SMARCA4 expression in tumors initiated from CCSP<sup>+</sup> cells in KPS animals.

(A) Representative SMARCA4 staining of a tumor-bearing lung from a KPS animal infected with Ad-CCSP-Cre. Scale bar: 1 mm. (B) Quantification of percentage of SMARCA4-positive and -negative tumors in the lungs of KPS animals (n=5) infected with Ad-CCSP-Cre. Data are mean  $\pm$  s.d. (C) Quantification of the number of micro-metastases observed per mouse in KP (n=6), KPS-HET (n=8), and KPS (n=6) animals 16 weeks post-infection. One-way ANOVA:  $F(2, 17) = 8.750$ ,  $p = 0.0024$ ; Dunnett's multiple comparisons test: \*\*adjusted  $p$ -value = 0.0048. (D) Representative H&E and SMARCA4 staining of Grade 4 tumors in KPS animals. Scale bars: 150  $\mu$ m. (E) Representative H&E and SMARCA4 staining of metastases in KPS animals. Scale bars: 250  $\mu$ m. (F) Percentage of KPS-HET animals (n=8) having SMARCA4-negative tumor cells 16 weeks post-infection. (G) Representative H&E and SMARCA4 staining of tumors in KP, KPS-HET, and KPS animals showing the presence of SMARCA4-negative cancer cells in KPS-HET tumors. Scale bars: 100  $\mu$ m.

# Supplementary Figure S4

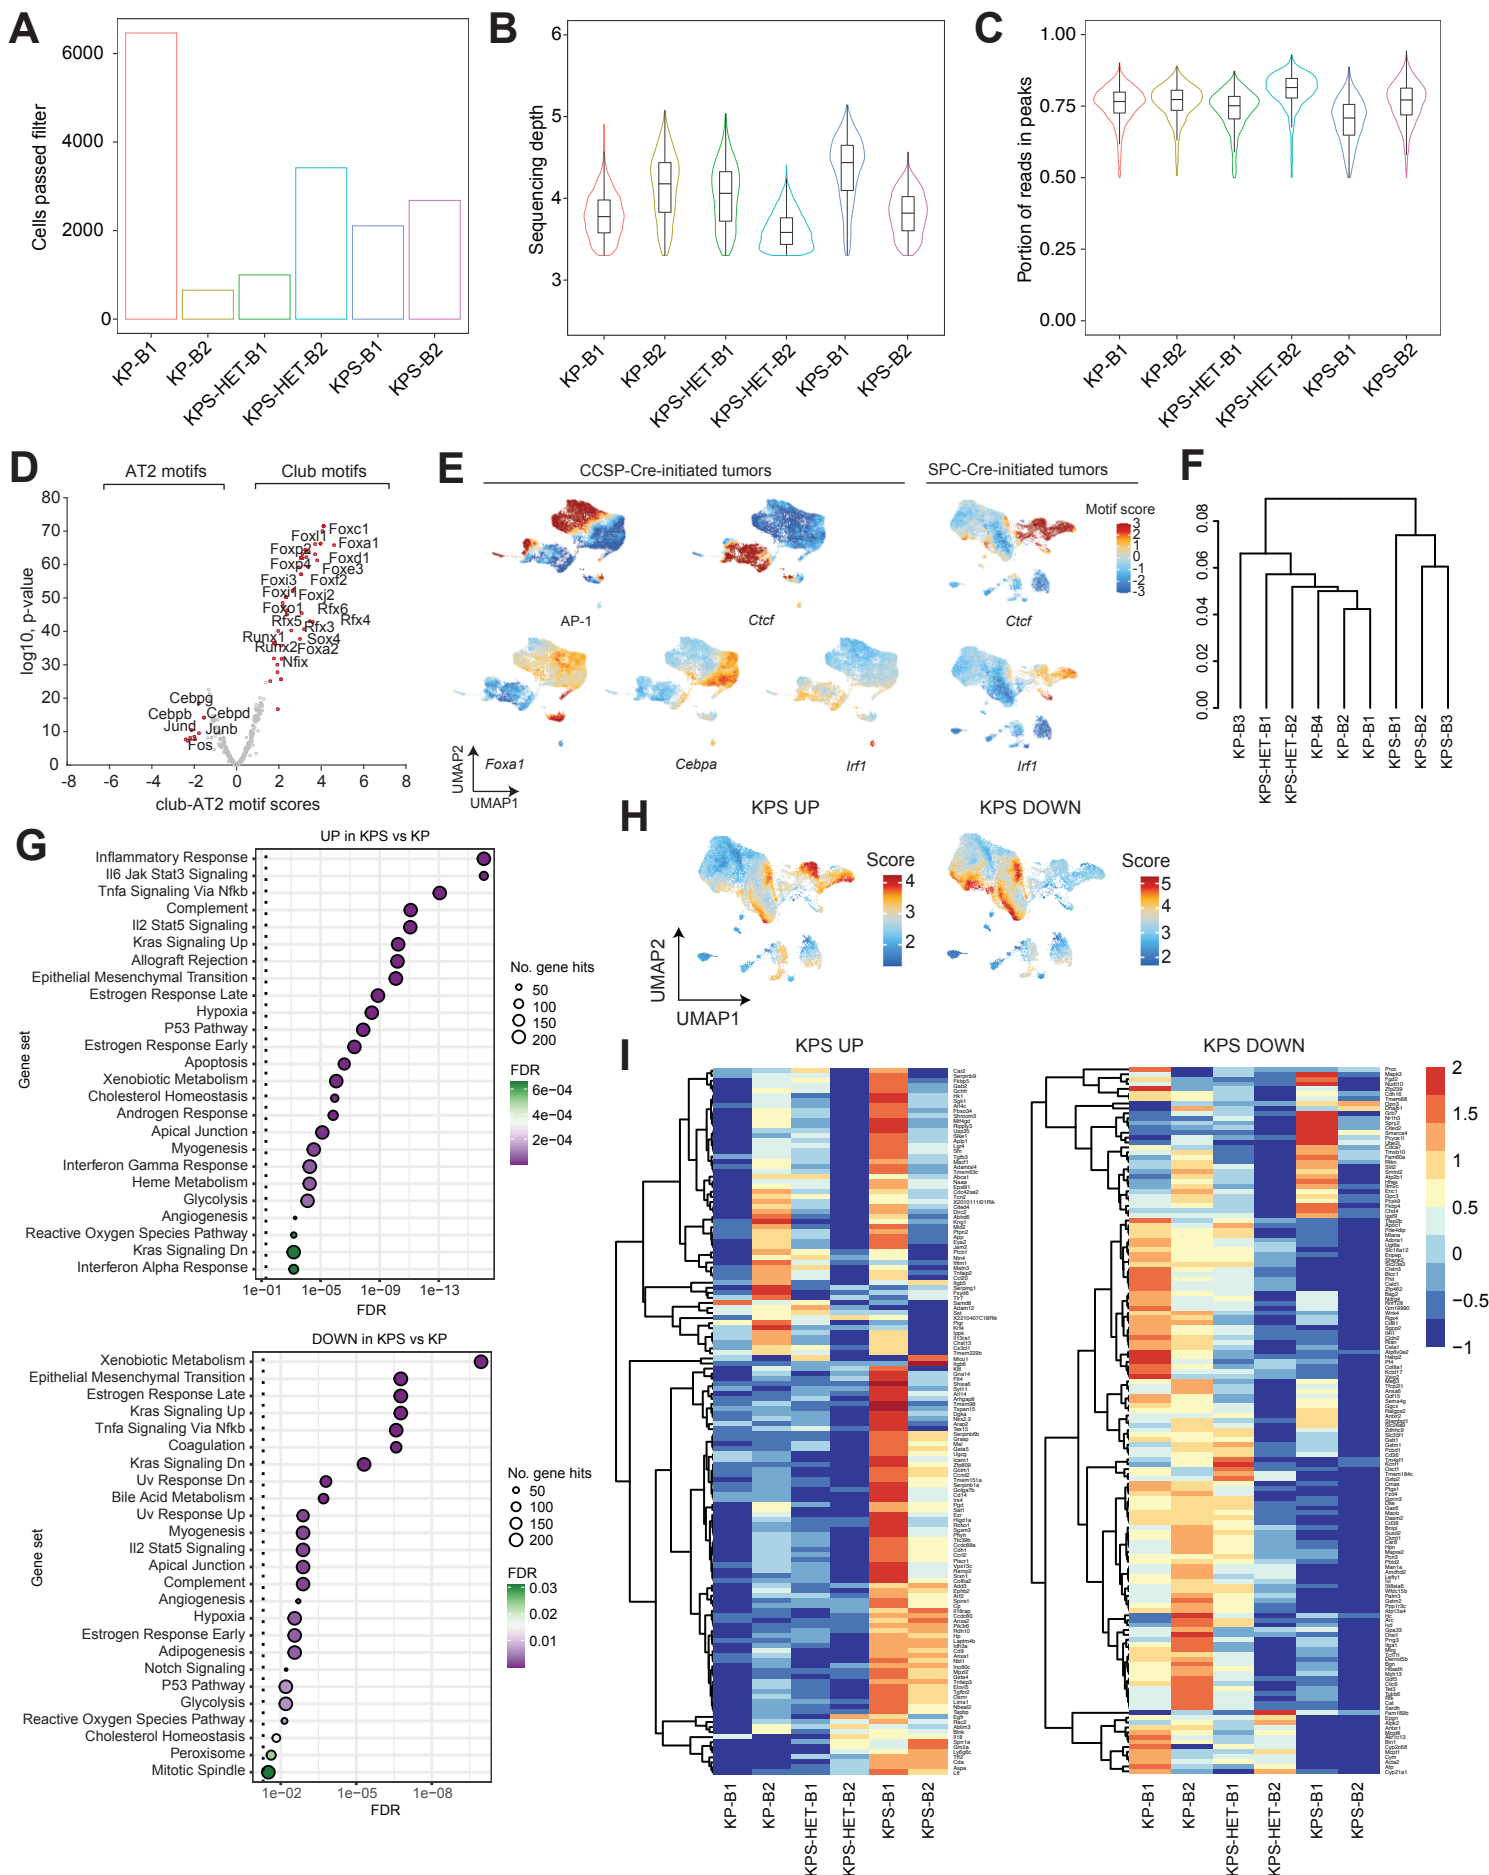

**Supplementary Figure S4. The chromatin accessibility profiles and features of *Smarca4*-deficient murine lung adenocarcinomas initiated from CCSP-expressing cells.**

Quality control metrics for scATAC-seq dataset showing: **(A)** number of cells per sample passing quality control filters; **(B)** sequencing depth per sample and; **(C)** fraction of reads in peaks. **(D)** Differentially accessible motifs between normal club and AT2 cells. **(E)** UMAP projection of murine scATAC-seq datasets colored by normalized motif scores of selected TFs. **(F)** Unsupervised hierarchical clustering of RNA-seq samples from KP (n=4), KPS-HET (n=2), and KPS (n=3) primary tumors. **(G)** Dot plot of enriched hallmark gene sets in genes with increased (upper panel) and decreased (lower panel) expression (*adjusted p-value* < 0.05, |FC|>1.5) in KPS primary tumors (n=3) compared to KP (n=4) primary tumors. Dots are sized on the log<sub>10</sub> scale of the number of genes in each hallmark gene set. Size legend shows raw number of genes. **(H)** UMAP visualization of the SPC scATAC-seq dataset colored by mean gene score of differential genes increased and decreased (*adjusted p-value* < 0.05, |FC|>1.5) in KPS primary tumors (n=3) compared to KP (n=4) primary tumors. **(I)** Heatmaps showing the mean gene scores of differential genes identified through RNA-seq in each CCSP scATAC-seq sample ( $p < 0.00001$ ).

# Supplementary Figure S5

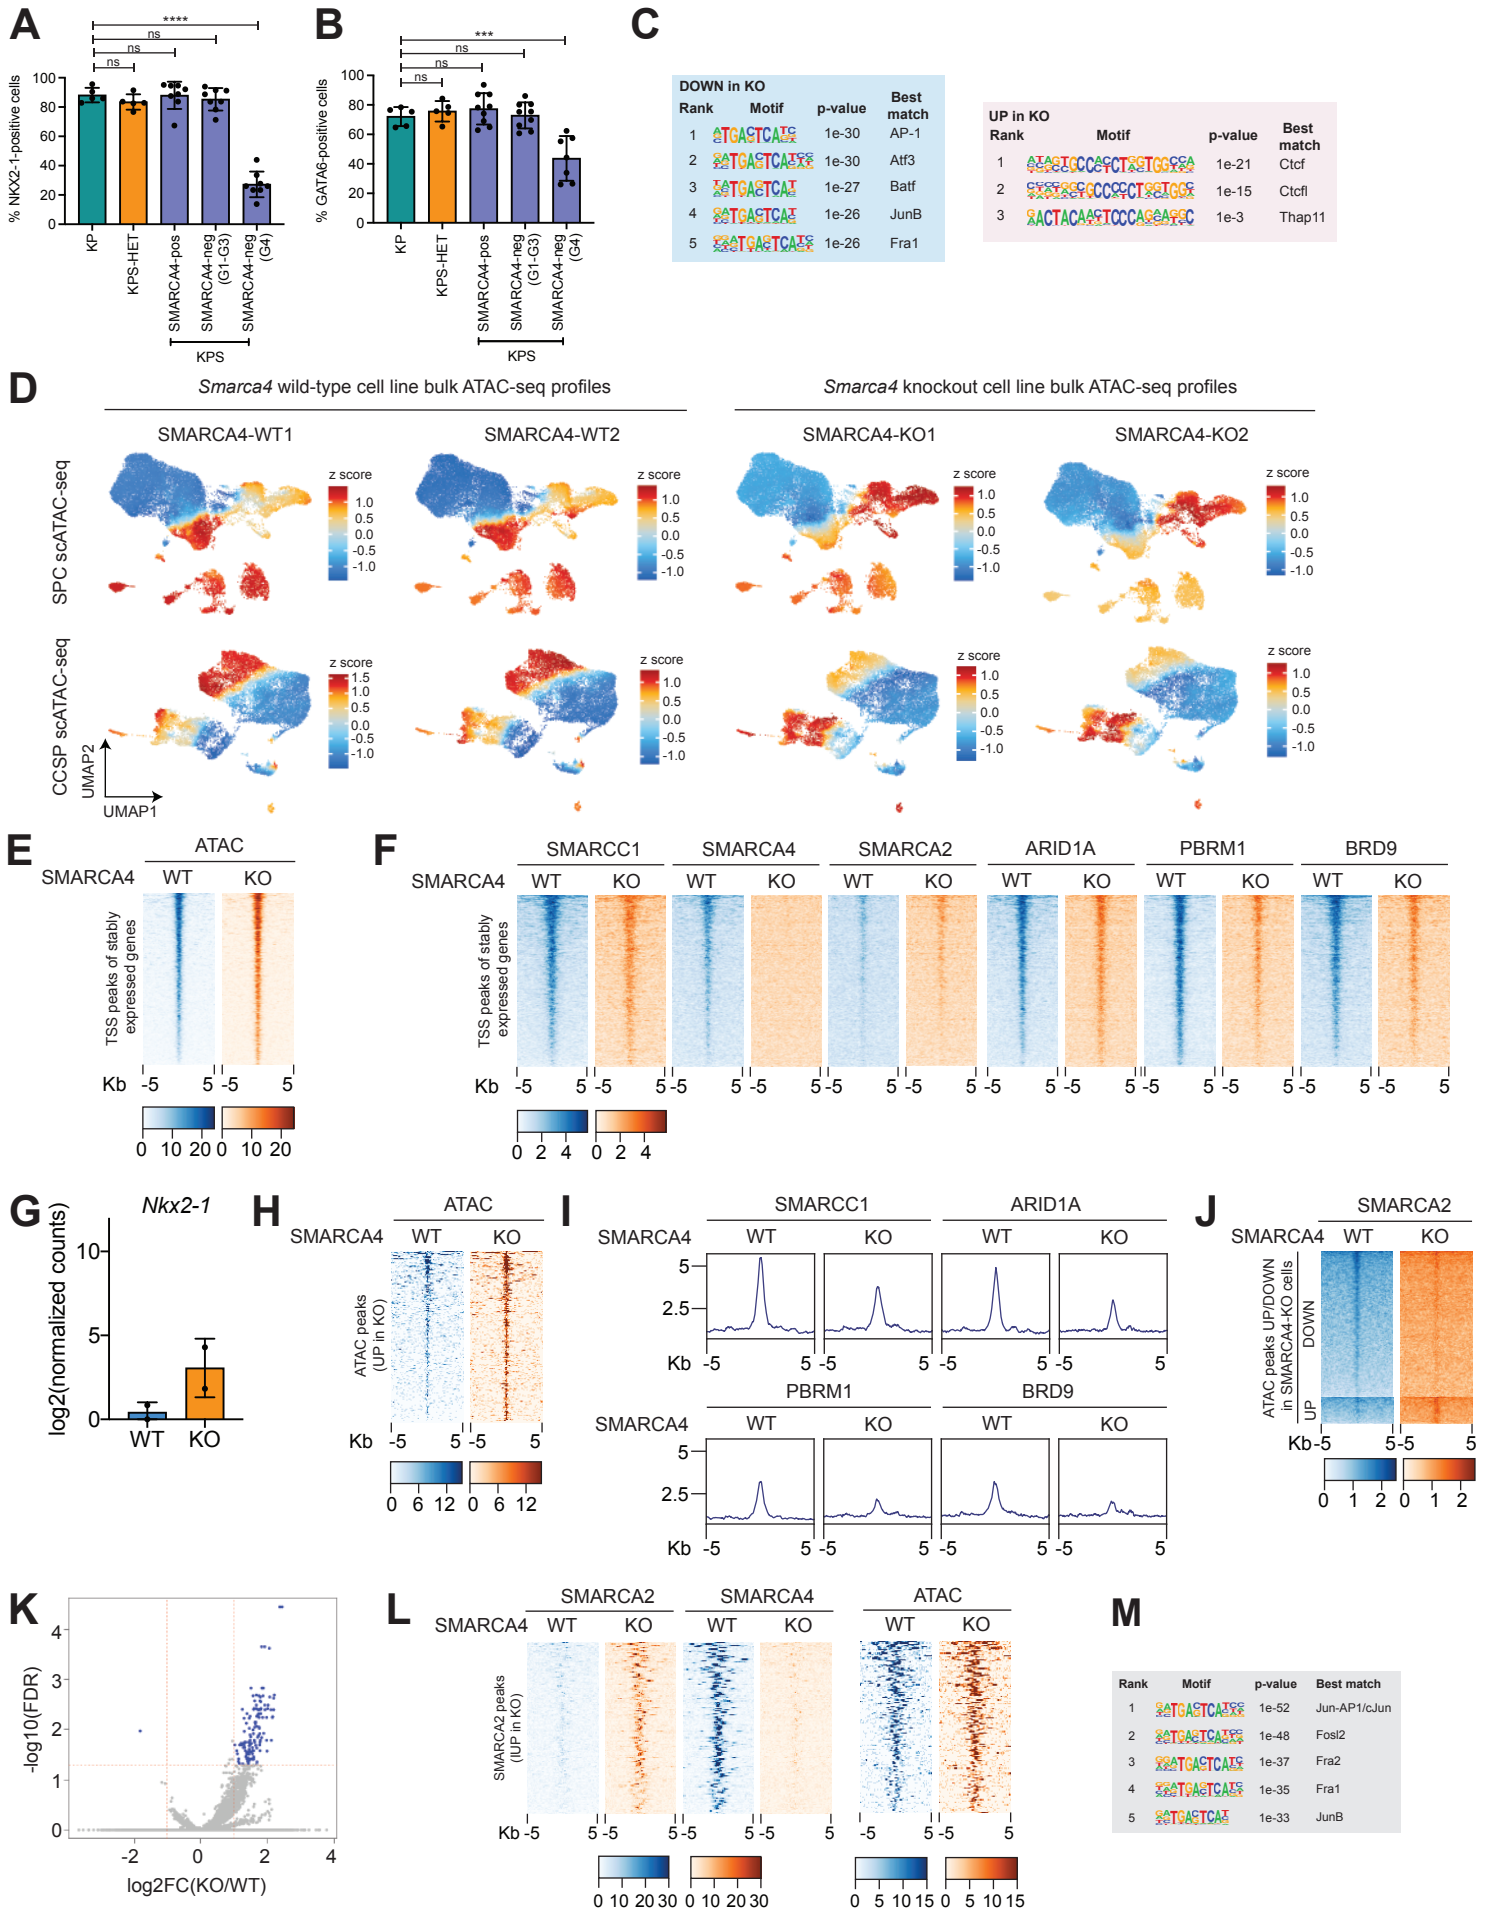

### Supplementary Figure S5. SWI/SNF function upon *Smarca4* inactivation.

**(A)** Quantification of NKX2-1 staining in lung tumors initiated from SPC<sup>+</sup> cells in KP (n=5), KPS-HET (n=5), and KPS (n=8) animals (grouped by SMARCA4 protein expression status and histological tumor grade). The average percentage of NKX2-1-positive cells per tumor in each mouse is shown. Data are mean  $\pm$  s.d. One-way ANOVA:  $F(4, 29) = 88.68$ ,  $p < 0.0001$ ; Dunnett's multiple comparisons test: \*\*\*\**adjusted p-value*  $< 0.0001$ . **(B)** Quantification of GATA6 staining in lung tumors initiated from SPC<sup>+</sup> cells in KP (n=5), KPS-HET (n=5), and KPS animals (grouped by SMARCA4 protein expression status and histological tumor grade where n=9 for SMARCA4-positive and SMARCA4-negative G1-G3 tumors and n=7 for SMARCA4-negative Grade 4 tumors). The average percentage of GATA6-positive cells per tumor in each mouse is shown. Data are mean  $\pm$  s.d. One-way ANOVA:  $F(4, 30) = 12.65$ ,  $p < 0.0001$ ; Dunnett's multiple comparisons test: \*\*\**adjusted p-value* = 0.0002. **(C)** Top motifs enriched in differential ATAC-seq peaks at distal intergenic regions between SMARCA4-WT and -KO cells. **(D)** UMAP visualization of the scATAC-seq datasets colored by z score for bulk ATAC-seq peak sets of SMARCA4-WT and -KO isogenic cells. **(E)** Representative ATAC-seq density heatmaps showing chromatin accessibility at TSS peaks of stably expressed genes between SMARCA4-WT and -KO cell lines. **(F)** Representative CUT&RUN density heatmaps showing occupancies of SWI/SNF subunits at TSS peaks of stably expressed genes between SMARCA4-WT and -KO cell lines. **(G)** Transcript levels of *Nkx2-1* in SMARCA4-WT and -KO cell lines in RNA-seq dataset. *Nkx2-1* is not differentially expressed ( $p_{DE} = 0.1398$  by DESeq2). **(H)** Representative ATAC-seq density heatmaps showing chromatin accessibility of differential ATAC-seq peaks at distal intergenic regions significantly increased in SMARCA4-KO LUAD. **(I)** Representative CUT&RUN density metaplots showing occupancies of the pan-SWI/SNF component SMARCC1 and SWI/SNF class-specific components ARID1A (cBAF), PBRM1 (PBAF), and BRD9 (ncBAF/GBAF) at differential ATAC-seq peaks at distal intergenic regions significantly increased in SMARCA4-KO LUAD. **(J)** Representative SMARCA2 CUT&RUN density heatmaps showing SMARCA2 occupancy at differential ATAC-seq peaks at distal intergenic regions between SMARCA4-WT and -KO LUAD. **(K)** Volcano plot showing differential SMARCA2 CUT&RUN peaks in SMARCA4-WT and -KO cells. Red lines indicate FDR  $< 0.05$  and  $|\log_2FC| > 1$  thresholds. **(L)** Representative SMARCA2 and SMARCA4 CUT&RUN and ATAC-seq density heatmaps showing SMARCA2 and SMARCA4 occupancies and chromatin accessibility at differential SMARCA2 peaks significantly increased in SMARCA4-KO LUAD (FDR  $< 0.05$ ). **(M)** Top motifs detected in significantly enriched SMARCA2 peaks (FDR  $< 0.05$ ) in SMARCA4-KO cells.

# Supplementary Figure S6

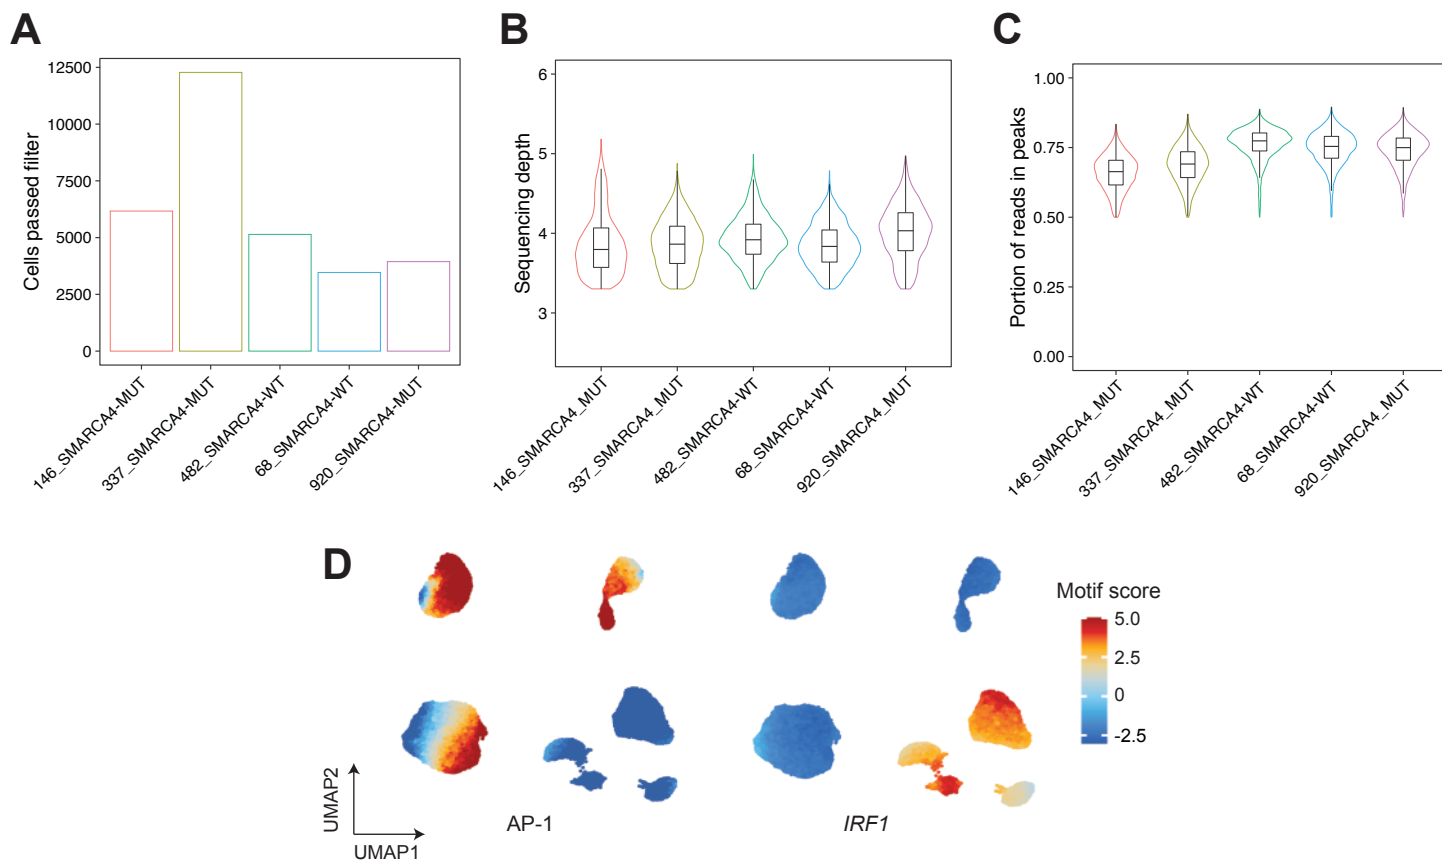

**Supplementary Figure S6. The chromatin accessibility profiles and features of *Smarca4*-mutant human LUAD.** Quality control metrics for scATAC-seq dataset showing: **(A)** number of cells per sample passing quality control filters; **(B)** sequencing depth per sample and; **(C)** fraction of reads in peaks. **(D)** UMAP projection of LUAD PDX scATAC-seq dataset colored by normalized motif scores of AP-1 and *IRF1*.



# Supplementary Figure S7

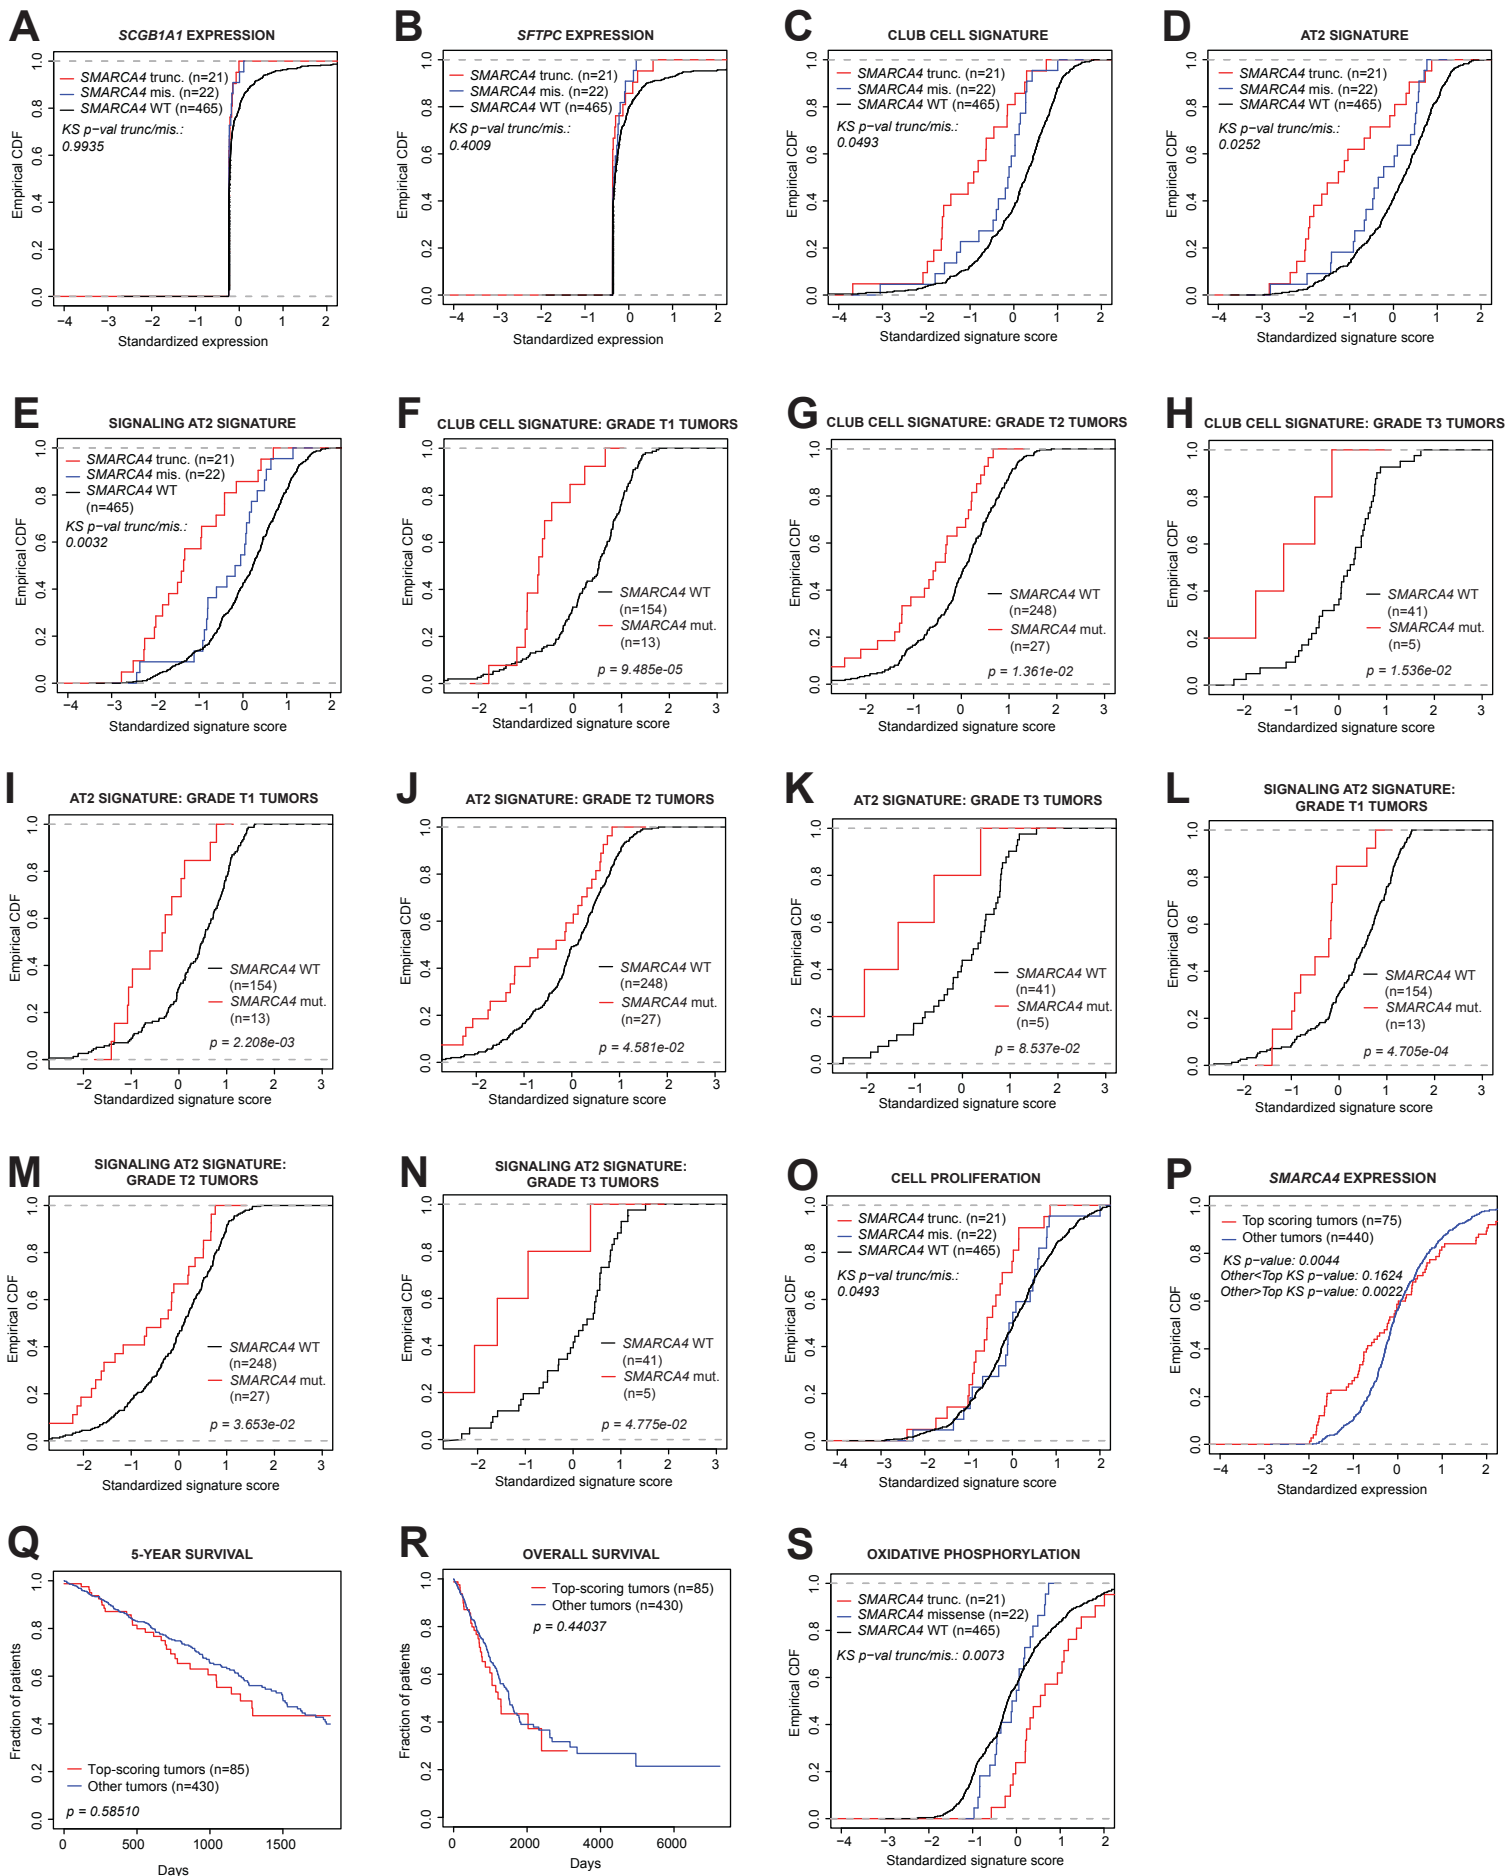

**Supplementary Figure S7. Lineage, ESC-like, and KPS signatures in *SMARCA4*-mutant TCGA LUAD patients.**

Empirical CDF plots of standardized *SCGB1A1* (**A**) and *SFTPC* (**B**) expression in *SMARCA4*-wild-type (WT), missense, and truncating mutant TCGA LUAD. Empirical CDF plots of standardized SS2 club cell (**C**), AT2 (**D**), and signaling AT2 (**E**) signature scores in TCGA LUAD with intact *SMARCA4* (WT), *SMARCA4* missense mutations, and *SMARCA4* truncating mutations. Empirical CDF plots of standardized 10x club cell (**F-H**), AT2 (**I-K**), and signaling AT2 (**L-N**) signature scores in TCGA LUAD with intact (WT) and mutant (mut) *SMARCA4* grouped by tumor grade. (**O**) Empirical CDF plots of standardized proliferation signature (GO\_8283) scores in TCGA LUAD with intact *SMARCA4* (WT), *SMARCA4* missense mutations, and *SMARCA4* truncating mutations. (**P**) Empirical CDF plot comparing standardized *SMARCA4* expression between top-scoring TCGA LUAD correlated to the ESC-like signature ( $z > 1$ ) and the rest of the cohort. (**Q**) 5-year and (**R**) overall Kaplan-Meier survival curves of the top TCGA LUAD patients correlated with KPS signature ( $z > 1$ ) compared with the rest of the cohort. (**S**) Empirical CDF plots of standardized oxidative phosphorylation signature scores in TCGA LUAD with intact *SMARCA4* (WT), *SMARCA4* missense mutations, and *SMARCA4* truncating mutations.
